# Supplementary material for: Prognostic Value of Genetic Alterations in Elderly Patients with Acute Myeloid Leukemia: A Single Institution Experience
Source: MDPI journal article supplement (doi:10.3390/cancers11040570), 2019-04-22
Supplement: s1 [file s1]

## Supplementary Materials

# Prognostic Value of Genetic Alterations in Elderly Patients with Acute Myeloid Leukemia: A Single Institution Experience

Maël Heiblig, Hélène Labussière-Wallet, Franck Emmanuel Nicolini, Mauricette Michallet, Sandrine Hayette, Pierre Sujobert, Adriana Plesa, Marie Balsat, Etienne Paubelle, Fiorenza Barraco, Isabelle Tigaud, Sophie Ducastelle, Eric Wattel, Gilles Salles and Xavier Thomas

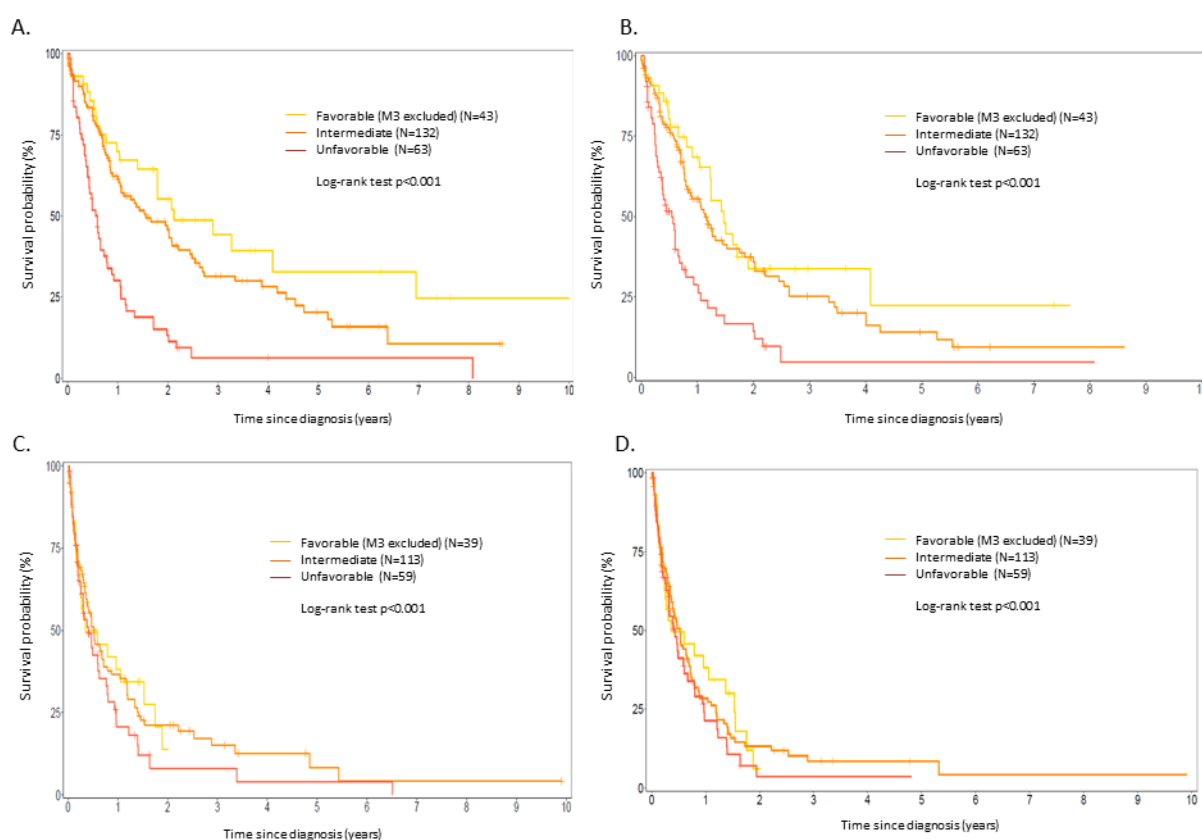

**Figure S1.** Survival curves according to age and ELN risk groups. (A) Group 1 overall survival according to the risk group; (B) Group 1 progression free survival according to the risk group; (C) Group 2 overall survival according to the risk group; (D) Group 2 progression free survival according to the risk group.

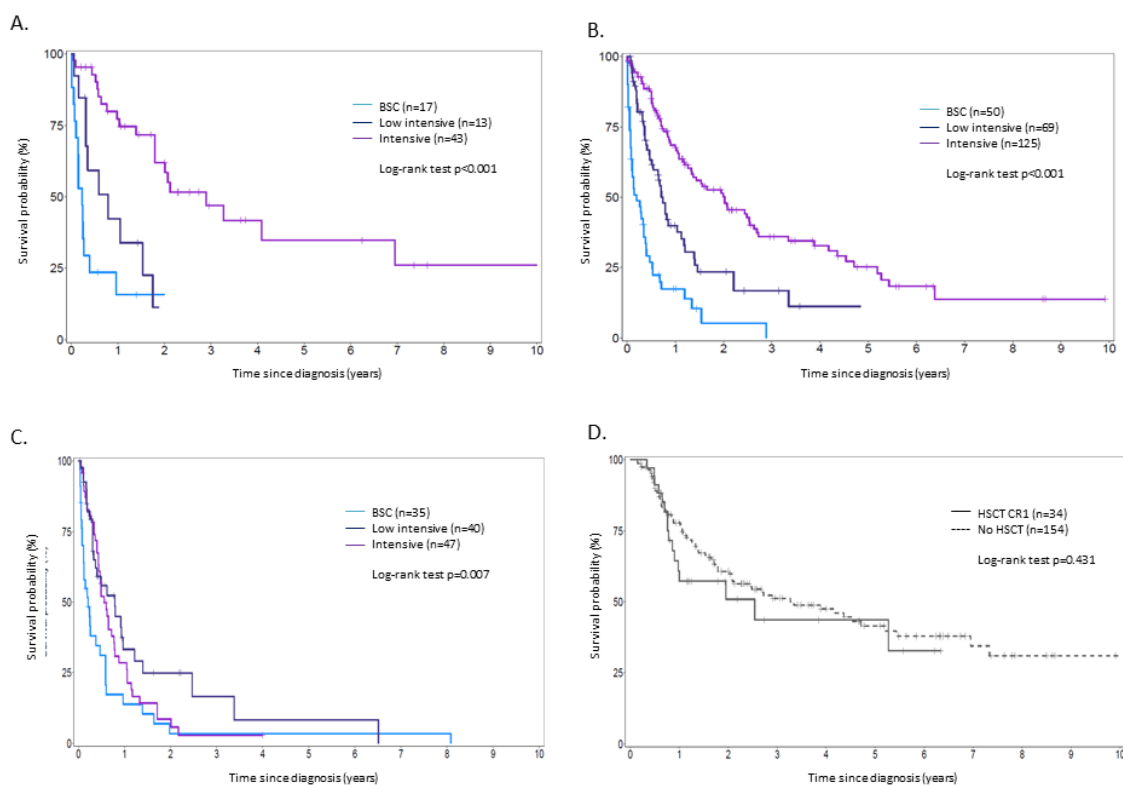

**Figure S2.** Survival curves according to treatment intensity and ELN risk groups. Overall survival of the entire cohort according to treatment intensity in (A) favorable, (B) intermediate and (C) unfavorable risk group. (D) Overall survival of patients allografted in CR1 vs. those without HSCT.

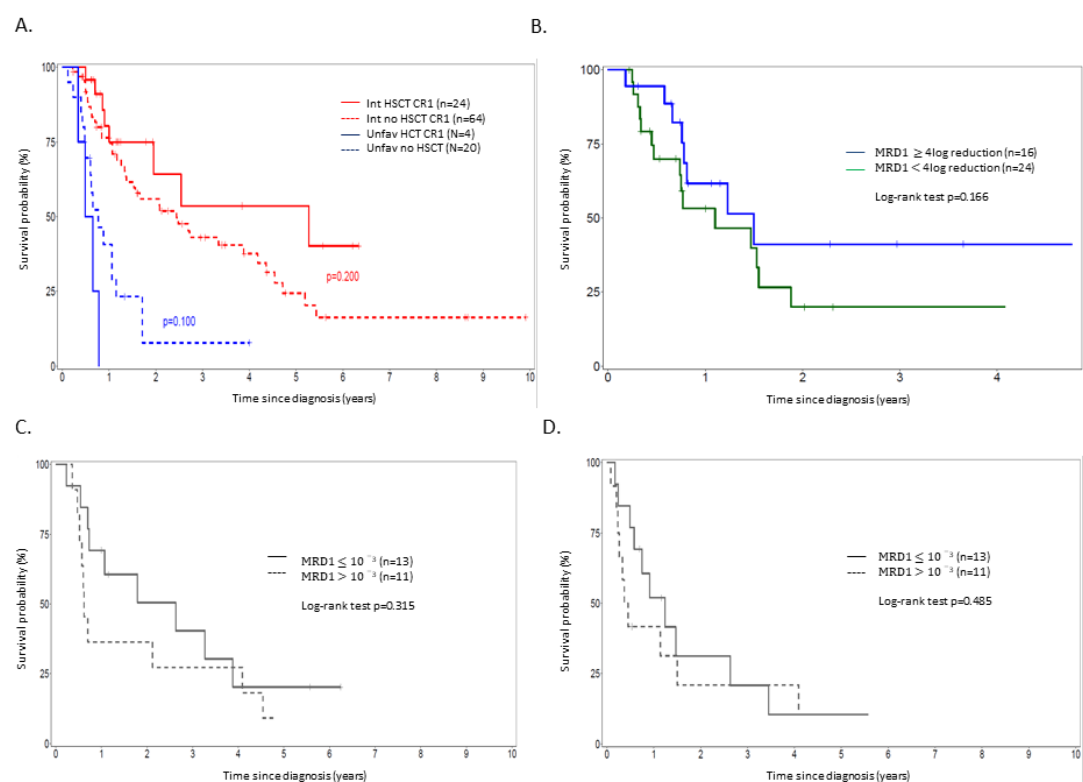

**Figure S3.** Survival curves according to *NPM1*/*WT1* molecular response and HSCT impact on survival. (A) Overall survival in intermediate and unfavorable risk group patients according to their HSCT status, (B) Progression free survival in *NPM1*<sup>+</sup> patients according to *NPM1* MRD1 log reduction, (C) Overall survival in *WT1* overexpressing patients according to *WT1* MRD1 absolute

value, (D) Progression free survival in *WT1* overexpressing patients according to *WT1* MRD1 absolute value.

**Table S1.** Cytogenetics and molecular demographics among ELN 2010 risk groups.

| Risk group                           | Karyotype                                                                                            | Total<br>(n = 474) | Group1: 60–69 yo<br>(n = 249) | Group2: 70+ yo<br>(n = 225) |
|--------------------------------------|------------------------------------------------------------------------------------------------------|--------------------|-------------------------------|-----------------------------|
| Favorable<br>risk group, n<br>(%)    | Normal karyotype with <i>NPM1</i> mutation<br>without <i>FLT3-ITD</i> or <i>FLT3-ITD</i> ratio <0.10 | 62 (13.1%)         | 37 (14.8%)                    | 25 (11.1%)                  |
|                                      | <i>CEBPα</i> double mutated                                                                          | 2/145 (1.4%)       | 0/83                          | 2/62 (3.2%)                 |
|                                      | <i>CBFβ</i> and <i>CBFα</i> AML                                                                      | 10 (2.1%)          | 7 (2.8%)                      | 3 (1.3%)                    |
|                                      | t(15;17)                                                                                             | 30 (6.3%)          | 16 (6.4%)                     | 14 (6.2%)                   |
| Intermediate<br>risk group, n<br>(%) | NK <i>NPM1-FLT3-</i>                                                                                 | 102 (21.5%)        | 58 (23.3%)                    | 44 (19.5%)                  |
|                                      | NK <i>NPM1+/FLT3-ITD+</i>                                                                            | 29 (6.1%)          | 15 (6%)                       | 14 (6.2%)                   |
|                                      | NK <i>NPM1-FLT3-ITD+</i>                                                                             | 15 (3.1%)          | 9 (3.6%)                      | 6 (2.7%)                    |
|                                      | t(3;5)(q21~25;q31~35)                                                                                | 0                  | 0                             | 0                           |
|                                      | t(9;11)(p21~22;q23)                                                                                  | 4 (1%)             | 2 (1%)                        | 2 (1%)                      |
|                                      | t(11;19)(q23;p13)                                                                                    | 1 (<1%)            | 1 (<1%)                       | 0 (<1%)                     |
|                                      | t(6;9)(p23;q34) without <i>FLT3-ITD</i>                                                              | 0                  | 0                             | 0                           |
|                                      | Non monosomal complex karyotype                                                                      | 13 (2.7%)          | 7 (2.8%)                      | 6 (2.7%)                    |
|                                      | All other karyotypes                                                                                 | 88 (18.6%)         | 40 (16.1%)                    | 48 (21.3%)                  |
| Unfavorable<br>risk group, n<br>(%)  | 3q abnormalities [excluding<br>t(3;5)(q21~25;q31~35)]                                                | 5 (1.1%)           | 3 (1.2%)                      | 2 (<1%)                     |
|                                      | inv(3)(q21q26.2) ou t(3;3)(q21;q26.2)                                                                | 2 (<1%)            | 1 (<1%)                       | 1 (<1%)                     |
|                                      | t(6;11)(q27;q23)                                                                                     | 2 (<1%)            | 1 (<1%)                       | 1 (<1%)                     |
|                                      | t(10;11)(p11~13;q23)                                                                                 | 1 (<1%)            | 0                             | 1 (<1%)                     |
|                                      | t(11q23) except t(9;11)(p21~22;q23) and<br>t(11;19)(q23;p13)                                         | 6 (1.3%)           | 1 (<1%)                       | 5 (2.2%)                    |
|                                      | add(5q), del(5q), -5                                                                                 | 2 (<1%)            | 0                             | 2 (<1%)                     |
|                                      | -7, add(7q)/del(7q)                                                                                  | 8 (1.7%)           | 4 (1.6%)                      | 4 (1.8%)                    |
|                                      | -17/17p abnormality                                                                                  | 15 (3.2%)          | 6 (2.4%)                      | 9 (4%)                      |
|                                      | Monosomal karyotype                                                                                  | 79 (16.7%)         | 30 (12.4%)                    | 49 (21.8%)                  |
|                                      | t(6;9)(p23;q34) with <i>FLT-ITD</i>                                                                  | 1 (<1%)            | 1 (<1%)                       | 0                           |

**Table S2.** Overall outcome according to the risk group independently of treatment intensity (excluding APL in favorable group).

| Age/risk group                                  | Median OS, Months (95% CI) | 1 year OS Probability, % (95% CI) | p-Value | Median PFS, Months (95% CI) | 1 year PFS Probability % (95% CI) | p-Value |
|-------------------------------------------------|----------------------------|-----------------------------------|---------|-----------------------------|-----------------------------------|---------|
| Overall                                         | 10.6 (8.7–12.8)            | 47.3 (42.8–52.2)                  | -       | 9.3 (8.1–11.1)              | 43.6 (39.1–48.6)                  | -       |
| Group 1                                         | 15.9 (12.2–23.8)           | 56.4 (50.4–63)                    | <0.001  | 12.7 (9.8–15.9)             | 52.7 (46.6–59.6)                  | <0.001  |
| Group 2                                         | 6.31 (4.8–9.4)             | 36.3% (30.2–43.7)                 |         | 6.4 (4.8–8.5)               | 32.8 (26.8–40.2)                  |         |
| Risk group                                      |                            |                                   |         |                             |                                   |         |
| Favorable                                       | 21.1 (9.4–25.4)            | 56.8 (46.1–69.9)                  | <0.001  | 14.8 (9.6–18.5)             | 55.9 (45–69.3)                    | <0.001  |
| Intermediate                                    | 10.8 (8.5–15.1)            | 49.2 (42.9–56.4)                  |         | 9.2 (8.2–12.5)              | 42.8 (36.5–50.1)                  |         |
| Unfavorable                                     | 5.9 (4.8–7.5)              | 25.8 (18.5–35.8)                  |         | 5.2 (4.4–7.1)               | 25.1 (17.7–35.6)                  |         |
| Survival according to risk group in age group 1 |                            |                                   |         |                             |                                   |         |
| Favorable                                       | 25.4 (21.4–NR)             | 69.9 (56.9–85.8)                  | <0.001  | 17.6 (14.7–NR)              | 68.5 (55–85.3)                    | <0.001  |
| Intermediate                                    | 18.3 (12.6–29.3)           | 59.9 (51.6–69.6)                  |         | 13.7 (9.8–19.1)             | 54.9 (46.3–65)                    |         |
| Unfavorable                                     | 6.8 (5.1–9.5)              | 30.1 (20.2–44.7)                  |         | 6.5 (4.4–8.6)               | 28.7 (18.6–44.3)                  |         |
| Survival according to risk group in age group 2 |                            |                                   |         |                             |                                   |         |
| Favorable                                       | 4.2 (2.9–21.1)             | 38.1 (23.8–61)                    | 0.55    | 4 (2.9–18.3)                | 37.5 (22–59.7)                    | 0.69    |
| Intermediate                                    | 6.3 (4.6–8.5)              | 36.5 (28–47.5)                    |         | 6.1 (4.6–8.2)               | 28.4 (20.6–39.2)                  |         |
| Unfavorable                                     | 4.8 (3.1–9.2)              | 20.7 (11.6–36.9)                  |         | 5.1 (3.7–9.4)               | 21.3 (12–37.9)                    |         |

Legend: NR = not reached, OS = overall survival, PFS = progression free survival, yo = years old.

**Table S3.** Clinical outcome according to the risk group and the initial treatment type after removing APL patients.

| Risk group   | Treatment Intensity | Total                      |         |                             | Group1: 60–69 yo (n = 260) |                            |         |                             | Group2: 70+ yo (n = 235) |                            |         |                             |         |
|--------------|---------------------|----------------------------|---------|-----------------------------|----------------------------|----------------------------|---------|-----------------------------|--------------------------|----------------------------|---------|-----------------------------|---------|
|              |                     | Median OS, Months (95% CI) | p-Value | Median PFS, Months (95% CI) | p-Value                    | Median OS, Months (95% CI) | p-Value | Median PFS, Months (95% CI) | p-Value                  | Median OS, Months (95% CI) | p-Value | Median PFS, Months (95% CI) | p-Value |
| Favorable    | Intensive           | 32.8 (22–NA)               |         | 16.5 (14.8–NR)              |                            | 34.8 (22–NR)               |         | 18 (14.8–NR)                |                          | 24.1 (1–NR)                |         | 12.5 (1.1–NR)               |         |
|              | Low intensive       | 12.6 (4–NR)                | <0.001  | 8.9 (3.7–NR)                | <0.001                     | - *                        | <0.001  | - *                         | NE                       | 12.6 (4–NR)                | 0.16    | 8.9 (3.7–NR)                | 0.1     |
|              | BSC                 | 2.7 (2–NR)                 |         | 2.7 (1.6–16.3)              |                            | - *                        |         | - *                         |                          | 2.7 (2–NR)                 |         | 2.7 (1.6–NR)                |         |
| Intermediate | Intensive           | 23.8 (16–32.3)             |         | 14.2 (10.6–21.1)            |                            | 24.2 (16.5–32.6)           |         | 15 (12.5–23.85)             |                          | 16.1 (10.6–NR)             |         | 10.5 (6.9–NR)               |         |
|              | Low intensive       | 8.5 (6.1–14.2)             | <0.001  | 8.15 (5.6–10.3)             | <0.001                     | 9.8 (8.4–NR)               | <0.001  | 8.8 (8.9–NR)                | <0.001                   | 7.7 (5.5–16.7)             | <0.001  | 7.7 (5–10.3)                | 0.02    |
|              | BSC                 | 2.2 (1.15–4.6)             |         | 2.2 (1.15–4.6)              |                            | 3.4 (1.5–5.6)              |         | 3.4 (1.5–5.6)               |                          | 0.7 (0.3–NR)               |         | 0.7 (0.3–NR)                |         |
| Unfavorable  | Intensive           | 6.8 (5–10)                 |         | 6.5 (4.4–8.6)               |                            | 6.8 (5–10)                 |         | 6.4 (4.4–9.5)               |                          | 7.4 (2–NA)                 |         | 6.8 (1.8–NA)                |         |
|              | Low intensive       | 9.8 (4–17)                 | 0.004   | 8.4 (4.5–16.8)              | 0.007                      | 11.1 (4–NR)                | 0.15    | 10.2 (4.5–NR)               | 0.1                      | 9.0 (4–17)                 | 0.009   | 7 (3.9–16.8)                | 0.02    |
|              | BSC                 | 2.9 (1.4–7.1)              |         | 2.5 (1–7)                   |                            | 3 (1–NR)                   |         | 2.9 (1.3–NR)                |                          | 2.5 (1–7)                  |         | 2.3 (1–7)                   |         |

\* No patients received low intensive or BSC. Legend: BSC = best supportive care, NE = non evaluable, NR = not reached, OS = overall survival, PFS = progression free survival, yo = years old.

**Table S4.** Clinical characteristics and outcome of *NPM1*+ and *WT1* OE patients according to their MRD1 response after standard induction.

| <i>NPM1</i> Mutated Patients       | MRD1 $\geq 4$ log (N = 16)   | MRD1 $< 4$ log (N = 24)   | <i>p</i> -Value |
|------------------------------------|------------------------------|---------------------------|-----------------|
| Median age, years (range)          | 64.1 (62.3–68.2)             | 64.9 (60–70.1)            | 0.87            |
| PS > 2, <i>n</i> (%)               | 1/13 (7.7%)                  | 4/23 (17.4%)              | 0.4             |
| LDH (range)                        | 427 (263–821)                | 828 (205–5800)            | 0.09            |
| NK, <i>n</i> (%)                   | 15/16 (93.7%)                | 21/24 (87.5%)             | 0.24            |
| <i>FLT3-ITD</i> +, <i>n</i> (%)    | 3/16 (18.7%)                 | 14/24 (58.3%)             | 0.01            |
| Median OS, months (range)          | 31.6 (8.8–NR)                | 7.4 (6.4–NR)              | 0.001           |
| <i>WT1</i> Overexpressing Patients | MRD1 $\leq 10^{-3}$ (N = 13) | MRD1 $> 10^{-3}$ (N = 11) | <i>p</i> -Value |
| Median age, years (range)          | 66 (60–69.7)                 | 66.5 (60–71.2)            | 0.91            |
| PS > 2, <i>n</i> (%)               | 1/13 (7.7%)                  | 1/11 (9.1%)               | 0.75            |
| LDH (range)                        | 852 (346–1660)               | 1135 (202–1800)           | 0.78            |
| NK, <i>n</i> (%)                   | 9/13 (69.2%)                 | 9/11 (81.8%)              | 0.47            |
| <i>FLT3-ITD</i> +, <i>n</i> (%)    | 3/13 (23.1%)                 | 5/11 (45.4%)              | 0.45            |
| Median OS, months (range)          | 25.4 (21.52–NR)              | 12.85 (8.4–24.15)         | 0.325           |

Legend: LDH = lactate dehydrogenase, MRD1 = post induction minimal residual disease by RT-qPCR, NK = normal karyotype, NR = not reached, OE = overexpression, OS = overall survival, PS = performance status.

**Table S5.** Univariate analysis.

| Variable                   | Modality         | OS    |              |                     | PFS  |              |                     |
|----------------------------|------------------|-------|--------------|---------------------|------|--------------|---------------------|
|                            |                  | HR    | 95% CI       | Cox <i>p</i> -Value | HR   | 95% CI       | Cox <i>p</i> -Value |
| Age at diagnosis (yo) *    |                  | 1.02  | (0.98–1.06)  | 0.317               | 1.01 | (0.97–1.05)  | 0.624               |
| Age groups                 | Group1: 60–69 yo | 1.00  | -            | -                   | 1.00 | -            | -                   |
|                            | Group2: 70+ yo   | 0.83  | (0.51–1.34)  | 0.437               | 0.89 | (0.57–1.40)  | 0.613               |
| Gender                     | M                | 1.00  | -            | -                   | 1.00 | -            | -                   |
|                            | F                | 1.05  | (0.76–1.46)  | 0.767               | 1.04 | (0.75–1.44)  | 0.829               |
| PS                         | 0                | 1.00  | -            | -                   | 1.00 | -            | -                   |
|                            | 1                | 0.92  | (0.64–1.32)  | 0.660               | 1.05 | (0.74–1.48)  | 0.806               |
|                            | 2 or more        | 1.85  | (1.18–2.90)  | 0.007               | 1.38 | (0.86–2.21)  | 0.176               |
| WBC *                      |                  | 1.01  | (1.00–1.01)  | <0.001              | 1.01 | (1.00–1.01)  | 0.001               |
| Hemoglobin *               |                  | 1.00  | (0.99–1.00)  | 0.684               | 1.00 | (0.99–1.01)  | 0.983               |
| Platelets *                |                  | 1.00  | (1.00–1.00)  | 0.297               | 1.00 | (1.00–1.00)  | 0.405               |
| Polymorphonuclear cells    |                  | 1.01  | (1.00–1.01)  | 0.169               | 1.01 | (1.00–1.02)  | 0.035               |
| Peripheral blasts (%)      |                  | 1.01  | (1.00–1.01)  | 0.002               | 1.01 | (1.00–1.01)  | 0.002               |
| Medullar blasts (%)        |                  | 1.00  | (0.99–1.01)  | 0.837               | 1.00 | (0.99–1.01)  | 0.807               |
| LDH *                      |                  | 1.00  | (1.00–1.00)  | 0.504               | 1.00 | (1.00–1.00)  | 0.131               |
| AML type                   | De novo          | 1.00  | -            | -                   | 1.00 | -            | -                   |
|                            | Secondary        | 1.54  | (1.12–2.12)  | 0.008               | 1.68 | (1.23–2.29)  | 0.001               |
|                            | No               | 1.00  | -            | -                   | 1.00 | -            | -                   |
| Extramedullar localization | No               | 1.00  | -            | -                   | 1.00 | -            | -                   |
|                            | SNC              | 1.19  | (0.58–2.43)  | 0.635               | 2.03 | (1.28–3.20)  | 0.002               |
| Normal karyotype           | Yes              | 1.00  | -            | -                   | 1.00 | -            | -                   |
|                            | No               | 1.13  | (0.81–1.57)  | 0.476               | 0.87 | (0.62–1.21)  | 0.396               |
|                            | Unknown          | 1.79  | (0.92–3.48)  | 0.084               | 1.60 | (0.77–3.34)  | 0.208               |
| ELN 2010 risk group        | Favourable       | 1.00  | -            | -                   | 1.00 | -            | -                   |
|                            | Intermediate     | 2.40  | (1.52–3.81)  | <0.001              | 3.07 | (1.91–4.94)  | <0.001              |
|                            | Unfavourable     | 7.89  | (4.61–13.51) | <0.001              | 8.39 | (4.92–14.32) | <0.001              |
|                            | Unknown          | 3.98  | (1.70–9.34)  | 0.001               | 5.45 | (2.28–12.99) | <0.001              |
| Response                   | CR               | 1.00  | -            | -                   | 1.00 | -            | -                   |
|                            | Refractory       | 3.53  | (2.51–4.95)  | <0.001              | 2.35 | (1.69–3.26)  | <0.001              |
|                            | Not evaluated    | 12.64 | (4.74–33.72) | <0.001              | 9.41 | (3.57–24.81) | <0.001              |
| <i>NPM1</i>                | Not mutated      | 1.00  | -            | -                   | 1.00 | -            | -                   |
|                            | Mutated          | 0.83  | (0.58–1.20)  | 0.328               | 0.81 | (0.56–1.17)  | 0.263               |
| <i>FLT3-ITD</i>            | Not mutated      | 1.00  | -            | -                   | 1.00 | -            | -                   |
|                            | Mutated          | 1.92  | (1.29–2.88)  | 0.001               | 1.79 | (1.14–2.82)  | 0.012               |
| <i>FLT3-TKD</i>            | Not mutated      | 1.00  | -            | -                   | 1.00 | -            | -                   |
|                            | Mutated          | 1.39  | (0.64–3.01)  | 0.402               | 1.54 | (0.70–3.38)  | 0.282               |
| <i>WT1</i>                 | Normal           | 1.00  | -            | -                   | 1.00 | -            | -                   |

|                                               |               |      |              |        |      |             |        |
|-----------------------------------------------|---------------|------|--------------|--------|------|-------------|--------|
| <i>MECOM1</i>                                 | Overexpressed | 1.16 | (0.82–1.63)  | 0.403  | 1.08 | (0.76–1.51) | 0.674  |
|                                               | Normal        | 1.00 | -            | -      | 1.00 | -           | -      |
| <i>IDH</i>                                    | Overexpressed | 1.12 | (0.74–1.70)  | 0.586  | 1.11 | (0.73–1.68) | 0.623  |
|                                               | Not mutated   | 1.00 | -            | -      | 1.00 | -           | -      |
|                                               | <i>IDH1</i>   | 0.62 | (0.36–1.10)  | 0.103  | 0.81 | (0.45–1.45) | 0.479  |
|                                               | <i>IDH2</i>   | 0.24 | (0.08–0.72)  | 0.011  | 0.20 | (0.07–0.60) | 0.004  |
| <i>DNMT3A</i>                                 | Not mutated   | 1.00 | -            | -      | 1.00 | -           | -      |
|                                               | Mutated       | 0.69 | (0.38–1.24)  | 0.215  | 0.93 | (0.52–1.66) | 0.803  |
| <i>MLL-DUP</i>                                | Not mutated   | 1.00 | -            | -      | 1.00 | -           | -      |
|                                               | Mutated       | 1.16 | (0.62–2.17)  | 0.639  | 1.08 | (0.56–2.11) | 0.813  |
| <i>FLT3-ITD-NPM1+</i>                         | Not mutated   | 1.00 | -            | -      | 1.00 | -           | -      |
|                                               | Mutated       | 0.30 | (0.17–0.54)  | <0.001 | 0.38 | (0.22–0.68) | 0.001  |
| <i>FLT3-TKD+NPM1+</i>                         | Not mutated   | 1.00 | -            | -      | 1.00 | -           | -      |
|                                               | Mutated       | 0.25 | (0.063–1.02) | 0.053  | 0.55 | (0.18–1.67) | 0.292  |
| <i>MRD1 NPM1</i> $\geq 4$ log reduction       | Yes           | 1.00 | -            | -      | 1.00 | -           | -      |
|                                               | No            | 3.32 | (1.42–7.77)  | 0.006  | 2.44 | (1.03–5.73) | 0.042  |
| Genetic characteristics at treatment decision | Absent        | 1.00 | -            | -      | 1.00 | -           | -      |
|                                               | Present       | 0.25 | (0.17–0.37)  | <0.001 | 0.32 | (0.21–0.49) | <0.001 |
| HSCT in CR1                                   | No            | 1.00 | -            | -      | 1.00 | -           | -      |
|                                               | Yes           | 1.25 | (0.76–2.05)  | 0.376  | 4.26 | (2.02–8.97) | <0.001 |

\* Continuous variables.

**Table S6.** Interaction score of variables influencing survival.

| Interaction                                                         | PFS   |         | OS    |         |
|---------------------------------------------------------------------|-------|---------|-------|---------|
|                                                                     | Chisq | p-Value | Chisq | p-Value |
| Age group x treatment intensity                                     | 0.56  | 0.76    | 0.82  | 0.66    |
| PS score x treatment intensity                                      | 5.98  | 0.55    | 5.56  | 0.59    |
| ELN risk group classification x treatment intensity                 | 10.53 | 0.10    | 8.92  | 0.18    |
| <i>FLT3-ITD</i> status x treatment intensity                        | 1.21  | 0.55    | 1.44  | 0.48    |
| Genetic characteristics at treatment decision x treatment intensity | 6.37  | 0.041   | 7.21  | 0.027   |

Legend: OS = overall survival, PFS = progression free survival, PS = performance status.

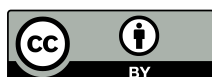

© 2019 by the authors. Licensee MDPI, Basel, Switzerland. This article is an open access article distributed under the terms and conditions of the Creative Commons Attribution (CC BY) license (<http://creativecommons.org/licenses/by/4.0/>).
